# Supplementary material for: Identification of key genes for secondary stroke in patients with periodontitis
Source: Research Square preprint supplement (doi:10.21203/rs.3.rs-5657155/v1), 2025-05-06
Supplement: Supplementary file 1 [file d17f72005bd6358105c8ff7f.pdf]

Ref: 251070

Permission is granted to Scientific Reports of Springer Nature Ltd to publish both in print and digital under the CC BY 4.0 open access license the following KEGG pathway map images in the article "Identification of key genes for secondary stroke in patients with periodontitis" written by Zunke Gong and colleagues:

- Toll-like receptor signaling pathway (map04620)
- NOD-like receptor signaling pathway (map04621)

subject to the condition that the original source is acknowledged by citing at least one KEGG paper.

Permission granted:



Naomi Takahashi, Kanehisa Laboratories

Date: 23 April 2025

Copyright holder: Kanehisa Laboratories
